# Supplementary material
Source: Springer Nature journal article supplement (https://www.springermedizin.de/resource/supplementary/12899_2003_57_MOESM4_ESM.pdf/9514840)

**VE (L/min, BTPS)**

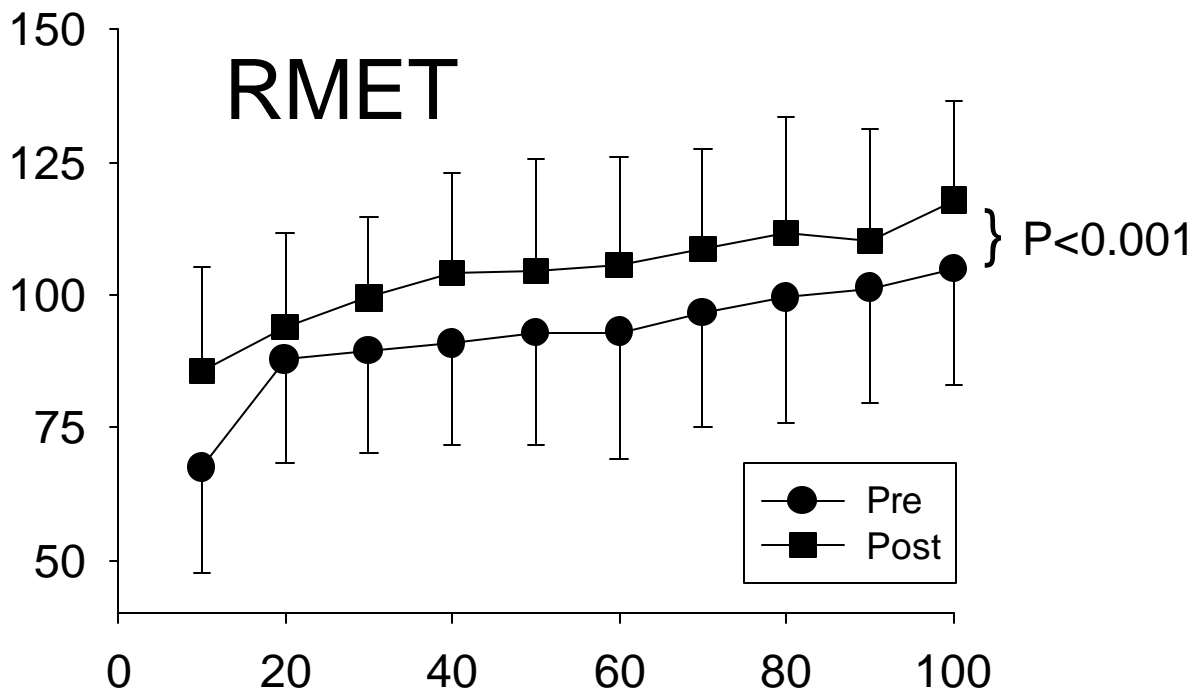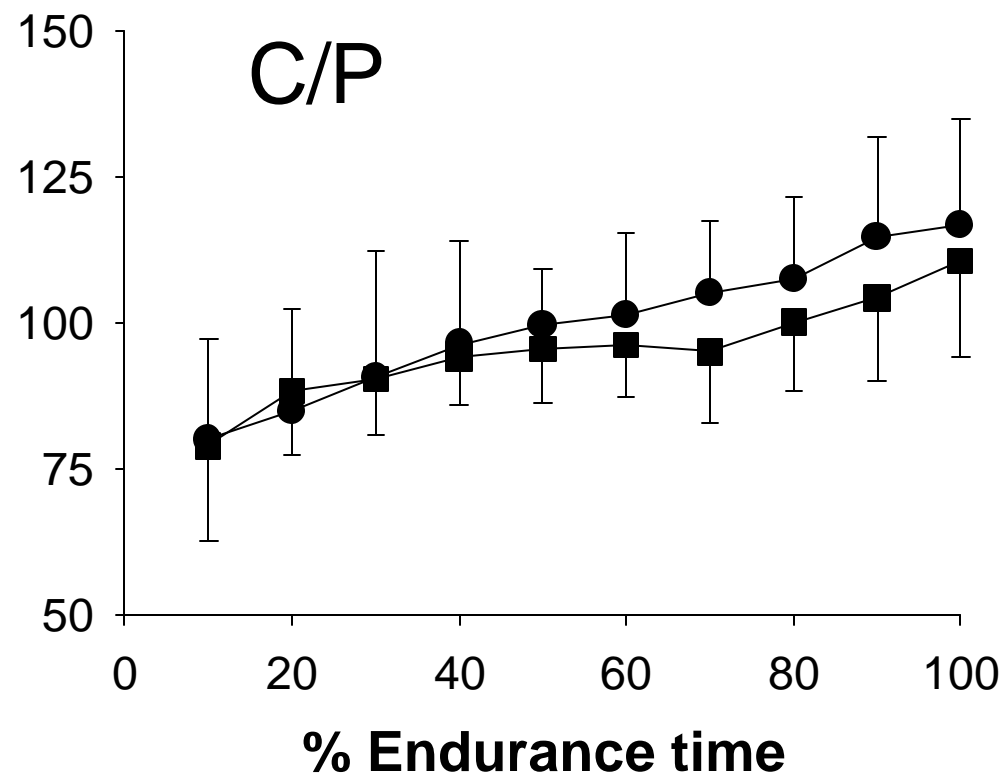

Supplement: MOESM4 [file 9514840]
